# Supplementary material for: Deficiency of IKKα in Macrophages Mitigates Fibrosis Progression in the Kidney after Renal Ischemia-Reperfusion Injury
Source: Hindawi journal article supplement (doi:10.1155/2021/5521051), 2021-12-07

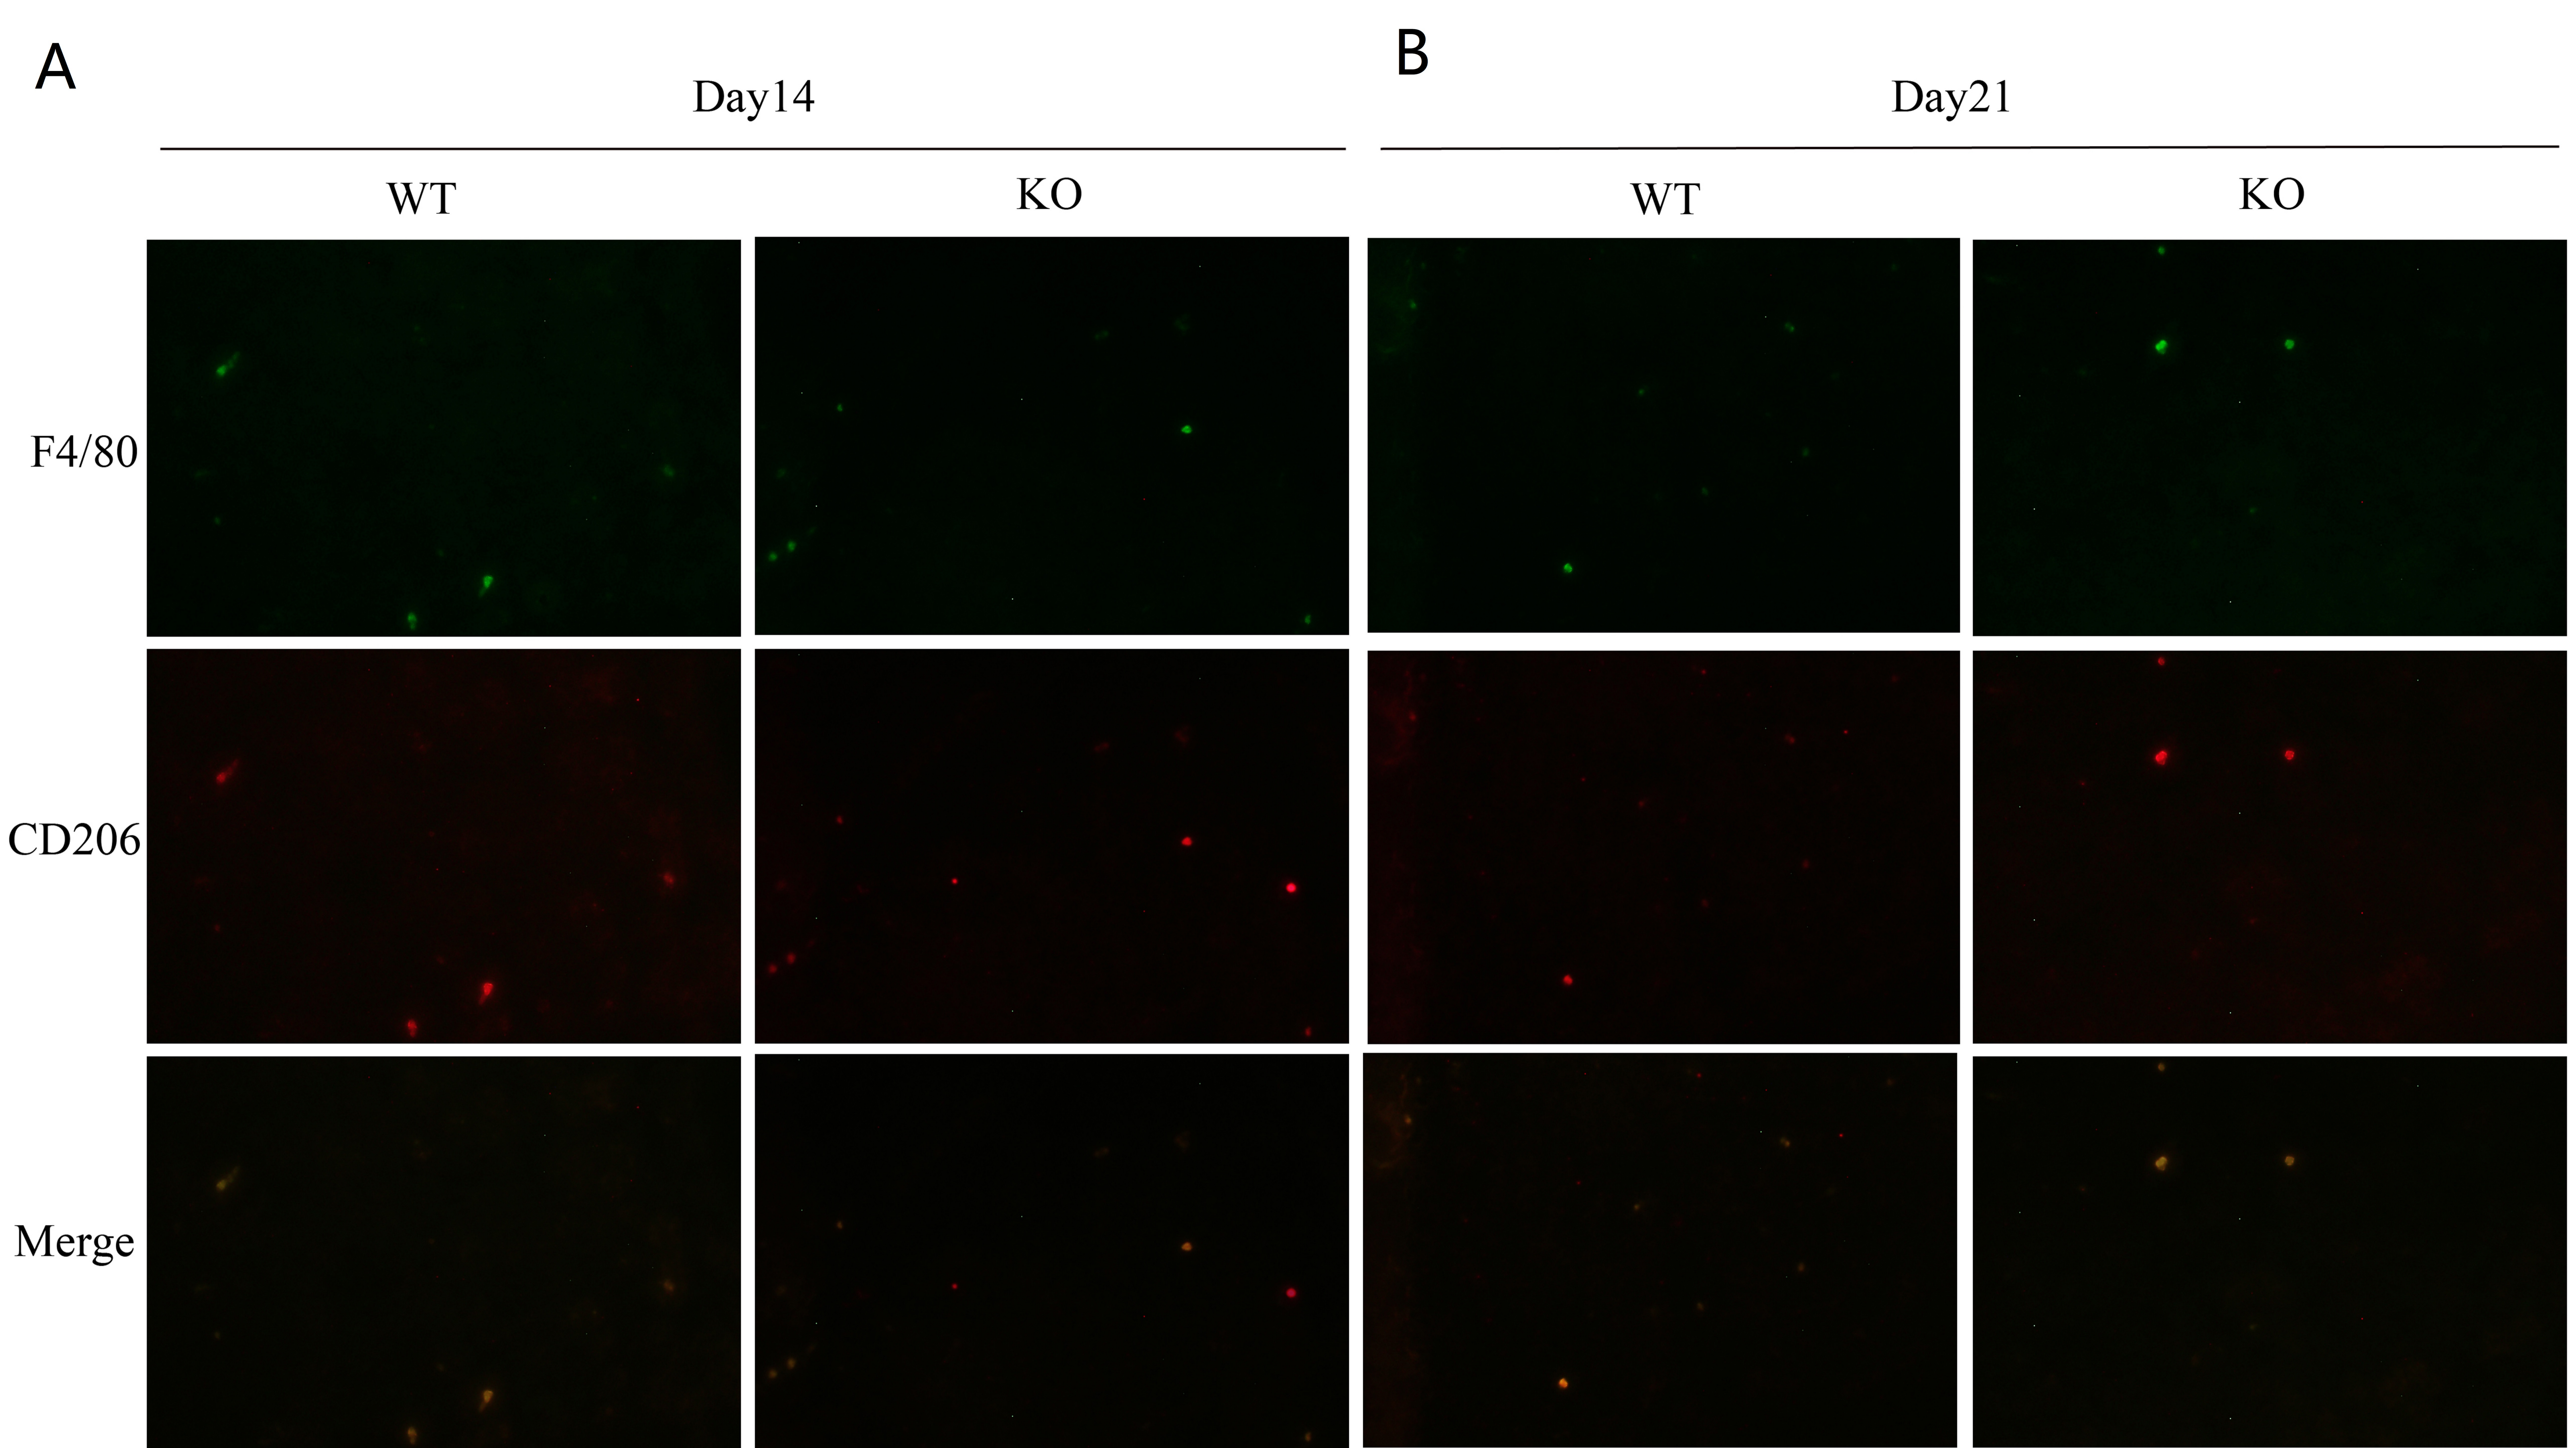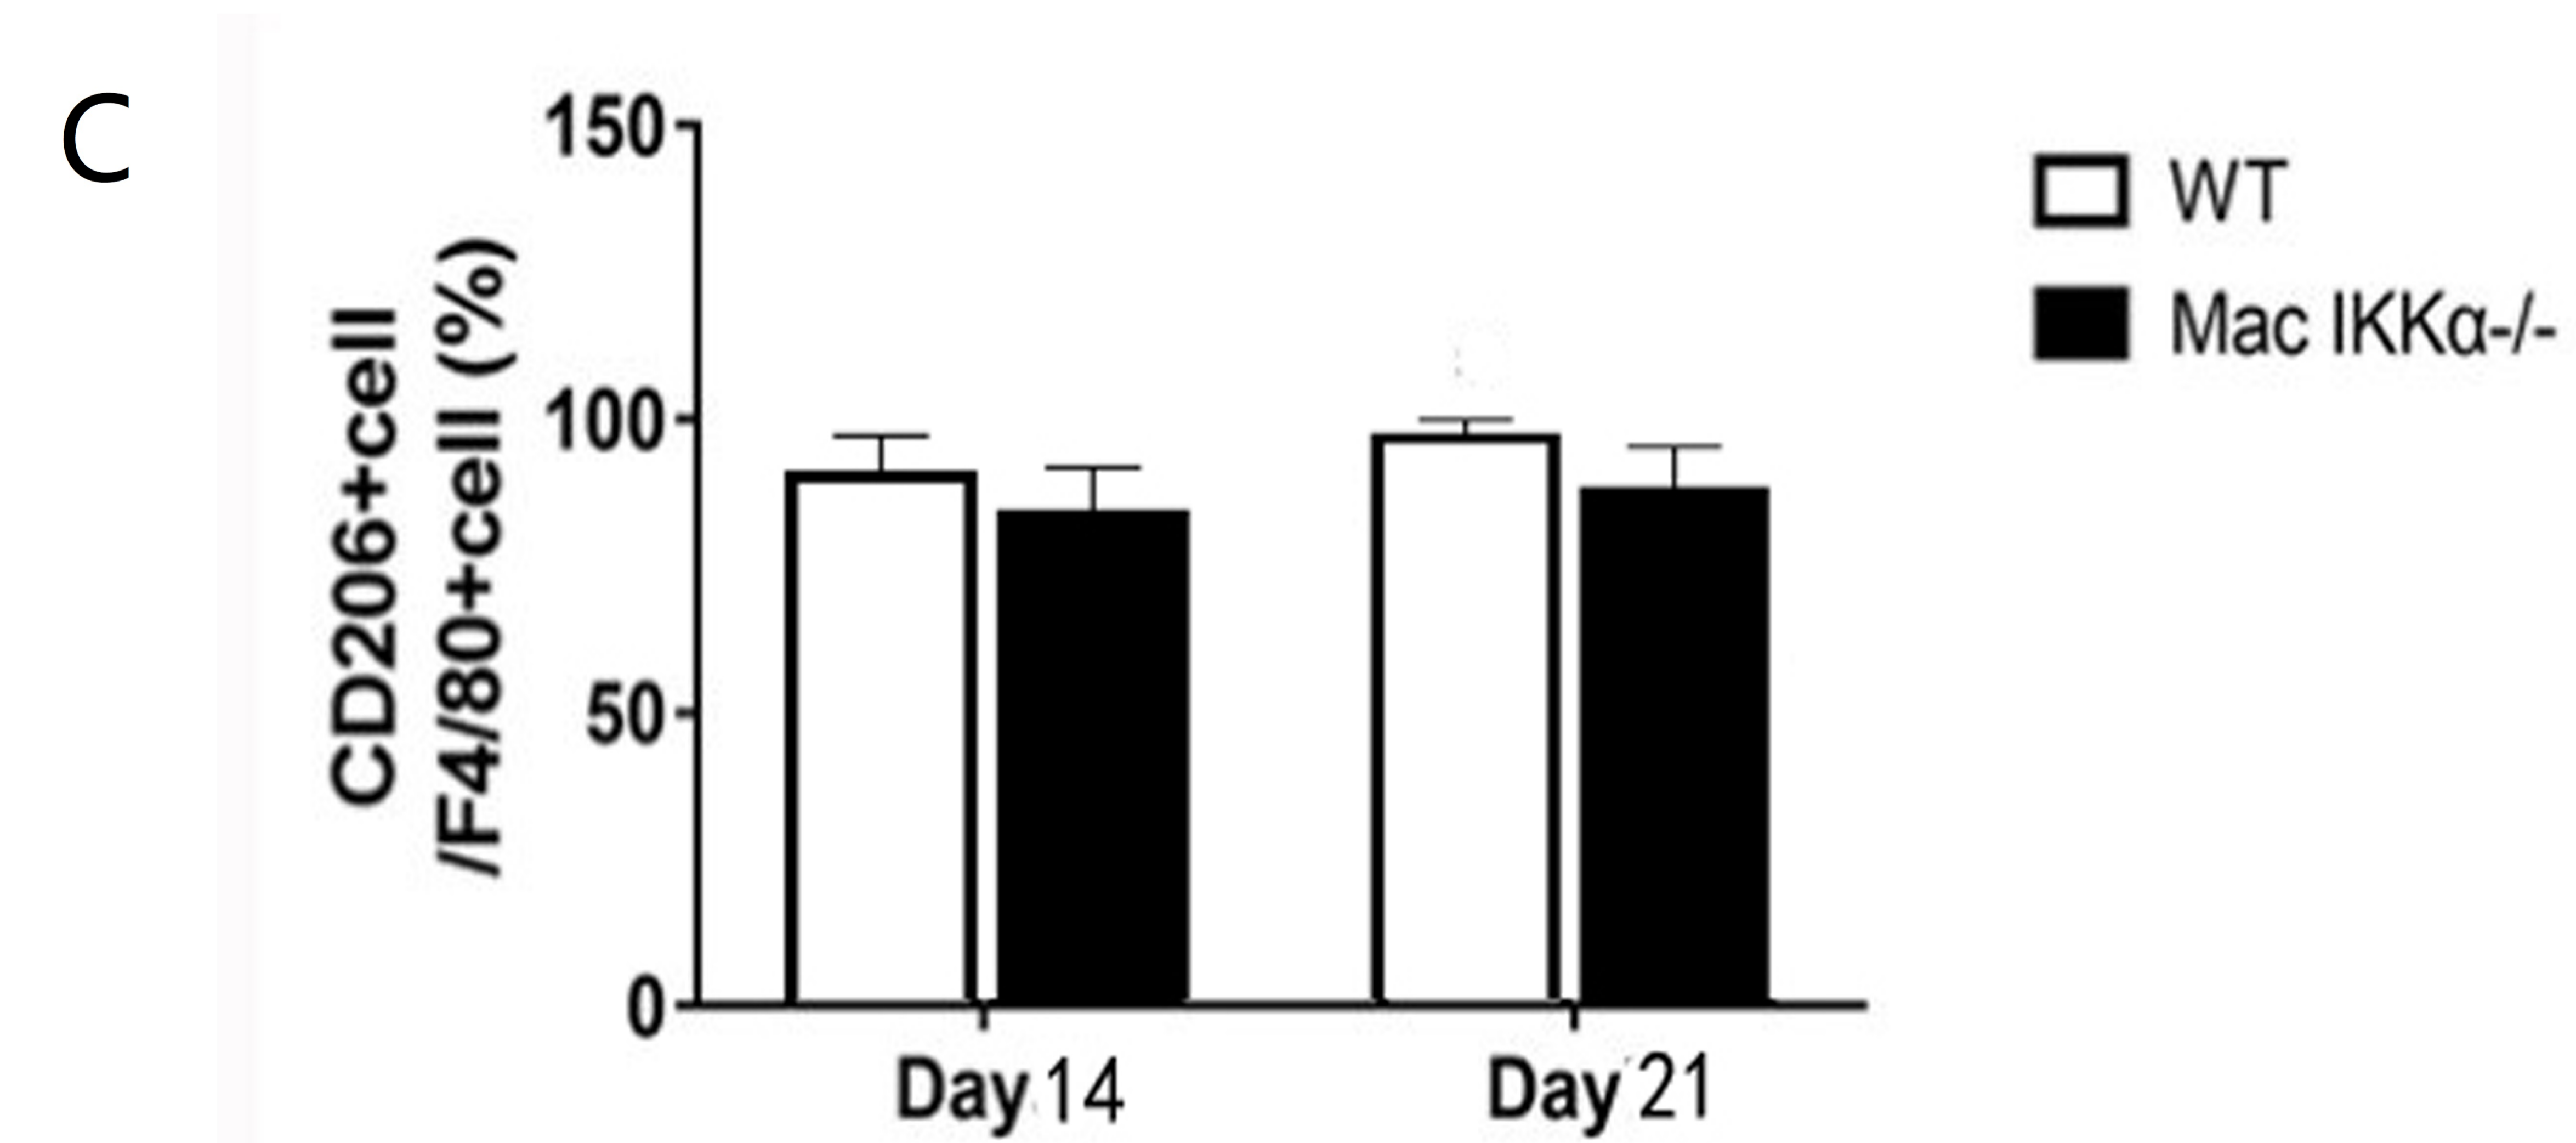

Supplement: f1 [file 5521051.f1.pdf]
